# Supplementary material
Source: publisher site journal article supplement (https://www.dovepress.com/article/373434)
Supplement: Supplementary file 1 [file get_supplementary_file.php]

## Supplementary materials

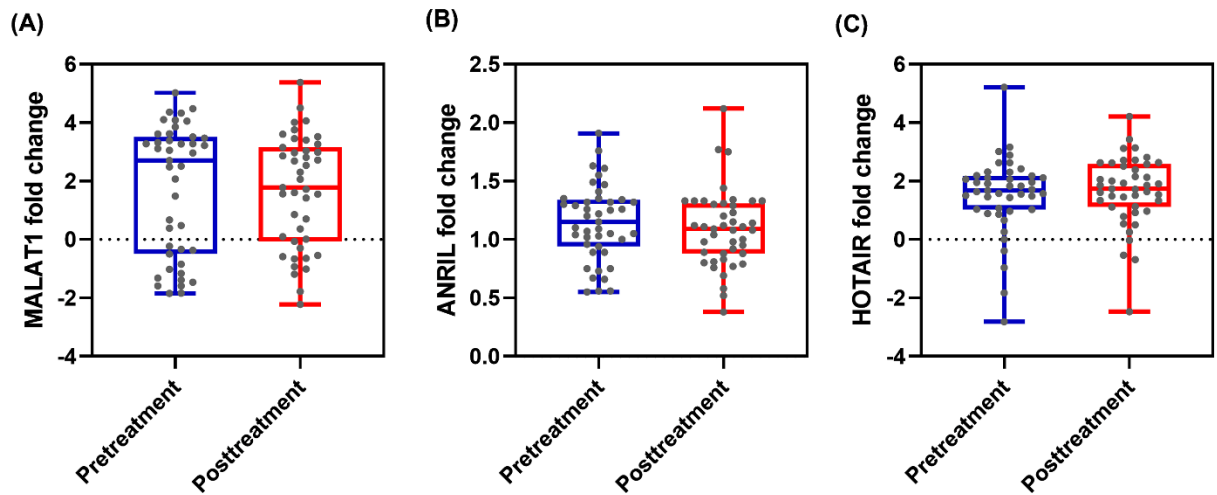

**Figure S1: The pre- and post-treatment relative expression levels of the studied circulatory long non-coding RNAs in neonates with sepsis cohort (n= 43).** Whiskers and bars represented the median (Q1 and Q3). (A) MALAT1 2.70 (- 0.50 – 3.51) and 1.78 (-0.06 – 3.15) ( $p$ -value = 0.742), (B) ANRIL 1.15 (0.94 – 1.34) and 1.09 (0.88 – 1.31), ( $p$ -value = 0.448), (C) HOTAIR 1.67 (1.03 – 2.18) and 1.74 (1.11 – 2.58) ( $p$ -value = 0.522) for pre- and post-treatment levels, respectively. All values were log-transformed with the control level sets at the zero lines. Wilcoxon matched-pairs signed-rank test was employed.

**Table S1.** Analysis of association of the three studied lncRNAs and comorbidities

| <b>Characteristics</b> | <b>Levels</b>            | <b>MALAT1</b> | <b>ANRIL</b> | <b>HOTAIR</b> |
|------------------------|--------------------------|---------------|--------------|---------------|
| <b>Demographics</b>    |                          |               |              |               |
| Onset                  | Early vs late            | 0.61          | 0.07         | 0.37          |
| Sex                    | Female vs male           | 0.88          | 0.62         | 0.74          |
| Mode of delivery       | CS vs vaginal            | 0.08          | 0.67         | 0.07          |
| Weight at birth        | LBWB vs normal           | <b>0.04</b>   | 0.52         | 0.10          |
| Maternal antibiotic    | Amoxycillin              |               |              |               |
| <b>Risk factors</b>    |                          |               |              |               |
|                        | Maternal diabetes        | 0.06          | 0.07         | 0.96          |
|                        | Maternal anemia          | 0.36          | 0.59         | 0.25          |
|                        | Maternal hypertension    | <b>0.032</b>  | 0.15         | 0.22          |
|                        | Triple I                 | 0.051         | 0.61         | 0.89          |
| Neonatal factors       | IUGR                     | 0.71          | 0.21         | 0.14          |
|                        | Total parental nutrition | 0.09          | 0.54         | 0.16          |
| Comorbidities          | Congenital heart disease | 0.23          | 0.21         | 0.22          |
|                        | Jejunal atresia          | 0.40          | 0.24         | 0.87          |
|                        | Inguinal hernia          | 0.68          | 0.71         | 0.59          |

*P*-values are shown; bold values indicate significance at *p*-value <0.05. The Mann-Whitney U test was performed for sepsis versus control.
